# Supplementary material
Source: publisher figshare collection journal article supplement (https://karger.figshare.com/ndownloader/files/12315416)
Supplement: Supplementary file 1 [file 12315416]

**Supplement table 3**: Modified Newcastle Ottawa scale of recruited studies

| Author (year) | Selection | | | | Comparability | Outcome | | | Score | Country |
| --- | --- | --- | --- | --- | --- | --- | --- | --- | --- | --- |
| Representative exposed cohort | Select non-exposed | Ascertain exposure | Outcome absent initial | Design or analysis basis | Assessment of outcome | Follow up duration | Follow up of cohorts |
| Koo, B.B. (2011) | 1 | - | 1 | 1 | 1 | 1 | 1 | 1 | 7 | US |
| Zinchuk, A.V. (2017) | 1 | - | 1 | 1 | 1 | 1 | 1 | 1 | 7 | US |
| Xie, J. (2017) | 1 | - | 1 | 1 | 2 | 1 | 1 | 1 | 8 | US |
| Coelho, F.M. (2010) | 1 | 1 | 1 | - | 1 | 1 | 1 | 1 | 7 | Canada |
| Chen, C.Y. (2016) | 1 | - | 1 | - | 2 | 1 | 1 | 1 | 7 | Taiwan |
| Benbir, G. (2012) | 1 | 1 | 1 | - | 1 | 1 | 1 | 1 | 7 | Turkey |
| Lindner, A. (2012) | - | 1 | 1 | 1 | 1 | 1 | 1 | 1 | 7 | Hungary |
| Jiang, B. (2013) | 1 | 1 | 1 | - | 2 | 1 | 1 | 1 | 8 | China |

Abbreviation: US: United States
